# Supplementary material for: Exercising alone versus with others and associations with subjective health status in older Japanese: The JAGES Cohort Study
Source: PubMed Central journal article supplement (PMC5156899; doi:10.1038/srep39151), 2016-12-15
Supplement: srep39151-s1.pdf [file srep39151-s1.pdf]

# Supplementary Information

Exercising alone versus with others and associations with subjective health status in older Japanese: The JAGES Cohort Study

Satoru Kanamori<sup>1,2</sup>, Tomoko Takamiya<sup>1\*</sup>, Shigeru Inoue<sup>1</sup>, Yuko Kai<sup>3</sup>, Ichiro Kawachi<sup>4</sup>, and Katsunori Kondo<sup>5,6,7</sup>

<sup>1</sup>Department of Preventive Medicine and Public Health, Tokyo Medical University, Tokyo, Japan

<sup>2</sup>Human Resource Management Department, ITOCHU Techno-Solutions Corporation, Tokyo, Japan

<sup>3</sup>Physical Fitness Research Institute, Meiji Yasuda Life Foundation of Health and Welfare, Tokyo, Japan

<sup>4</sup>Department of Social and Behavioral Sciences, Harvard School of Public Health, Boston, Massachusetts, United States of America

<sup>5</sup>Center for Preventive Medical Sciences, Chiba University, Chiba, Japan

<sup>6</sup>Center for Well-being and Society, Nihon Fukushi University, Aichi, Japan

<sup>7</sup>Department of Gerontology and Evaluation Study, Center for Gerontology and Social Science, National Center for Geriatrics and Gerontology, Obu city, Aichi, Japan

**E-mail addresses**

satoru\_kanamori@hotmail.com (S. Kanamori)

takamiya@tokyo-med.ac.jp (T. Takamiya)

inoue@tokyo-med.ac.jp (S. Inoue)

y-kai@my-zaidan.or.jp (Y. Kai)

IKAWACHI@hsph.harvard.edu (I. Kawachi)

kkondo@chiba-u.jp (K. Kondo)

**Corresponding author:**

Tomoko Takamiya

Department of Preventive Medicine and Public Health, Tokyo Medical University

6-1-1 Shinjuku, Shinjuku-ku, Tokyo, 160- 8402, Japan

Phone: +81-3-3351-6141, Fax: +81-3-3353-0162

E-mail address: takamiya@tokyo-med.ac.jp

|                       |                | Exercising with others (Ewo) |                |            |            |            |            |
|-----------------------|----------------|------------------------------|----------------|------------|------------|------------|------------|
|                       |                | None                         | A few times/yr | 1-3/mo     | 1/wk       | 2-3/wk     | ≥4/wk      |
| Exercising alone (Ea) | None           |                              |                |            |            |            |            |
|                       | A few times/yr |                              |                |            |            |            |            |
|                       | 1-3/mo         |                              |                |            |            |            |            |
|                       | 1/wk           |                              |                |            |            |            |            |
|                       | 2-3/wk         |                              |                |            |            |            |            |
| ≥4/wk                 |                |                              |                |            |            |            |            |
|                       |                | Non-exercisers               | Category 1     | Category 2 | Category 3 | Category 4 | Category 5 |

Supplementary Fig. S1: Total frequency of exercise

Categories 1 to 3: people who exercised less than twice a week

Categories 4 and 5: people who exercise at least twice a week
